# Supplementary material for: Outcome Assessment after Reconstruction of Tumor-Related Mandibular Defects Using Free Vascularized Fibular Flap—A Clinical Study
Source: MDPI journal article supplement (doi:10.3390/healthcare11020193), 2023-01-09
Supplement: s1 [file s1]

**Supplementary Table S1.** Distribution of OHIP-14 scale responses ( $n=18$ ).

| Q   | OHIP-14 scale                                        | The stage when the questionnaire was filled | Never (N) | Rarely (N) | Sometimes (N) | Repeatedly (N) | Always (N) |
|-----|------------------------------------------------------|---------------------------------------------|-----------|------------|---------------|----------------|------------|
| 1.  | Have you had trouble pronouncing any words?          | Before surgery                              | 3         | 2          | 8             | 4              | 1          |
|     |                                                      | After surgery                               | 2         | 2          | 5             | 6              | 3          |
|     |                                                      | After dental rehab                          | 4         | 12         | 1             | 1              | 0          |
| 2.  | Have you felt that your sense of taste has worsened? | Before surgery                              | 2         | 2          | 9             | 2              | 3          |
|     |                                                      | After surgery                               | 1         | 1          | 13            | 2              | 1          |
|     |                                                      | After dental rehab                          | 11        | 3          | 3             | 1              | 0          |
| 3.  | Have you had painful aching in your mouth?           | Before surgery                              | 0         | 1          | 2             | 12             | 3          |
|     |                                                      | After surgery                               | 8         | 7          | 3             | 0              | 0          |
|     |                                                      | After dental rehab                          | 16        | 1          | 1             | 0              | 0          |
| 4.  | Have you found it uncomfortable to eat any foods?    | Before surgery                              | 1         | 1          | 9             | 4              | 3          |
|     |                                                      | After surgery                               | 0         | 2          | 9             | 4              | 3          |
|     |                                                      | After dental rehab                          | 16        | 1          | 1             | 0              | 0          |
| 5.  | Have you been self-conscious?                        | Before surgery                              | 0         | 2          | 7             | 9              | 0          |
|     |                                                      | After surgery                               | 1         | 3          | 13            | 1              | 0          |
|     |                                                      | After dental rehab                          | 16        | 2          | 0             | 0              | 0          |
| 6.  | Have you felt tense?                                 | Before surgery                              | 0         | 1          | 16            | 1              | 0          |
|     |                                                      | After surgery                               | 0         | 2          | 16            | 0              | 0          |
|     |                                                      | After dental rehab                          | 13        | 2          | 3             | 0              | 0          |
| 7.  | Has your diet been unsatisfactory?                   | Before surgery                              | 8         | 4          | 3             | 2              | 1          |
|     |                                                      | After surgery                               | 12        | 1          | 5             | 0              | 0          |
|     |                                                      | After dental rehab                          | 9         | 7          | 1             | 1              | 0          |
| 8.  | Have you had to interrupt meals?                     | Before surgery                              | 0         | 1          | 8             | 8              | 1          |
|     |                                                      | After surgery                               | 0         | 6          | 8             | 4              | 0          |
|     |                                                      | After dental rehab                          | 9         | 9          | 0             | 0              | 0          |
| 9.  | Have you found it difficult to relax?                | Before surgery                              | 0         | 1          | 7             | 8              | 2          |
|     |                                                      | After surgery                               | 0         | 2          | 9             | 6              | 1          |
|     |                                                      | After dental rehab                          | 15        | 2          | 1             | 0              | 0          |
| 10. | Have you been a bit embarrassed?                     | Before surgery                              | 0         | 2          | 9             | 5              | 2          |
|     |                                                      | After surgery                               | 3         | 4          | 5             | 3              | 3          |
|     |                                                      | After dental rehab                          | 17        | 1          | 0             | 0              | 0          |
| 11. | Have you been a bit irritable with others?           | Before surgery                              | 0         | 0          | 16            | 2              | 0          |
|     |                                                      | After surgery                               | 2         | 5          | 9             | 2              | 0          |
|     |                                                      | After dental rehab                          | 9         | 8          | 1             | 0              | 0          |
| 12. | Have you had difficulty doing your usual job?        | Before surgery                              | 0         | 3          | 10            | 4              | 1          |
|     |                                                      | After surgery                               | 0         | 0          | 15            | 2              | 1          |
|     |                                                      | After dental rehab                          | 17        | 1          | 0             | 0              | 0          |
| 13. | Have you felt that life, in general,                 | Before surgery                              | 0         | 0          | 3             | 6              | 9          |
|     |                                                      | After surgery                               | 0         | 2          | 9             | 4              | 3          |

|     |                                      |                    |   |    |    |   |   |
|-----|--------------------------------------|--------------------|---|----|----|---|---|
|     | <b>was less satisfying?</b>          | After dental rehab | 9 | 7  | 2  | 0 | 0 |
| 14. | <b>Have been unable to function?</b> | Before surgery     | 0 | 0  | 10 | 6 | 2 |
|     |                                      | After surgery      | 0 | 1  | 6  | 9 | 2 |
|     |                                      | After dental rehab | 2 | 15 | 1  | 0 | 0 |

*N: frequency*
